# Supplementary material for: Duplication history and molecular evolution of the rbcS multigene family in angiosperms
Source: PubMed Central journal article supplement — J Exp Bot. 2019 Sep 9;70(21):6127–39. doi: 10.1093/jxb/erz363 (PMC6859733; doi:10.1093/jxb/erz363), 2019-09-09
Supplement: erz363_suppl_supplementary-tables-s1-s2-and-figures-s1-s2.pdf [file erz363_suppl_supplementary-tables-s1-s2-and-figures-s1-s2.pdf]

**Table S1. Correspondence of gene copy names in Fig.1 and gene ID in Phytozome**

| <b>Name of <i>rbcS</i> gene copy in Fig.1</b> | <b>Gene ID in Phytozome database</b>    |
|-----------------------------------------------|-----------------------------------------|
| Eucgr.K02223                                  | <i>Eucalyptus_grandis_copy1</i>         |
| Eucgr.B03013                                  | <i>Eucalyptus_grandis_copy2</i>         |
| Eucgr.J01502                                  | <i>Eucalyptus_grandis_copy3</i>         |
| GSVIVG01008288001                             | <i>Vitis_vinifera_copy1</i>             |
| Kalax.0543s0033                               | <i>Kalanchoe_laxiflora_copy1</i>        |
| Kaladp0039s0498                               | <i>Kalanchoe_fedtschenkoi_copy1</i>     |
| Kalax.0216s0010                               | <i>Kalanchoe_laxiflora_copy2</i>        |
| Kalax.0654s0003                               | <i>Kalanchoe_laxiflora_copy3</i>        |
| Kaladp0442s0049                               | <i>Kalanchoe_fedtschenkoi_copy2</i>     |
| Kalax.0039s0111                               | <i>Kalanchoe_laxiflora_copy4</i>        |
| Migut.I00348                                  | <i>Mimulus_guttatus_copy1</i>           |
| Migut.D01471                                  | <i>Mimulus_guttatus_copy2</i>           |
| Migut.D01473                                  | <i>Mimulus_guttatus_copy3</i>           |
| gene17686v1.0hybrid                           | <i>Fragaria_vesca_copy1</i>             |
| Prupe.3G157200                                | <i>Prunus_persica_copy1</i>             |
| MDP0000252890                                 | <i>Malus_domestica_copy1</i>            |
| MDP0000524809                                 | <i>Malus_domestica_copy2</i>            |
| MDP0000731480                                 | <i>Malus_domestica_copy3</i>            |
| gene03736v1.0hybrid                           | <i>Fragaria_vesca_copy2</i>             |
| Prupe.1G311400                                | <i>Prunus_persica_copy2</i>             |
| MDP0000547788                                 | <i>Malus_domestica_copy4</i>            |
| MDP0000185022                                 | <i>Malus_domestica_copy5</i>            |
| MDP0000392485                                 | <i>Malus_domestica_copy6</i>            |
| Lus10017597.g                                 | <i>Linum_usitatissimum_copy1</i>        |
| Lus10033558.g                                 | <i>Linum_usitatissimum_copy2</i>        |
| Lus10009172.g                                 | <i>Linum_usitatissimum_copy3</i>        |
| Lus10028471.g                                 | <i>Linum_usitatissimum_copy4</i>        |
| Aqcoe3G038800                                 | <i>Aquilegia_coerulea_copy1</i>         |
| Aqcoe3G038900                                 | <i>Aquilegia_coerulea_copy2</i>         |
| Thhalv10019199m.g                             | <i>Eutrema_salsugineum_copy1</i>        |
| Thhalv10019202m.g                             | <i>Eutrema_salsugineum_copy2</i>        |
| Brara.B01696                                  | <i>Brassica_rapa_copy1</i>              |
| Brara.K01182                                  | <i>Brassica_rapa_copy2</i>              |
| Cagra.3694s0005                               | <i>Capsella_grandiflora_copy1</i>       |
| Carubv10021016m.g                             | <i>Capsella_rubella_copy1</i>           |
| Bostr.26959s0199                              | <i>Boechera_stricta_copy1</i>           |
| AT1G67090                                     | <i>Arabidopsis_thaliana_copy1</i>       |
| AL2G25460                                     | <i>Arabidopsis_lyrata_copy1</i>         |
| Araha.1584s0003                               | <i>Arabidopsis_halleri_copy1</i>        |
| Thhalv10027955m.g                             | <i>Eutrema_salsugineum_copy3</i>        |
| Brara.D00896                                  | <i>Brassica_rapa_copy3</i>              |
| Bol040168                                     | <i>Brassica_oleracea_capitata_copy1</i> |
| Bol040169                                     | <i>Brassica_oleracea_capitata_copy2</i> |
| Brara.D00895                                  | <i>Brassica_rapa_copy4</i>              |
| Bol040165                                     | <i>Brassica_oleracea_capitata_copy3</i> |
| Brassica_rapa.D01185                          | <i>Brassica_rapa_copy5</i>              |
| Brassica_rapa.G01432                          | <i>Brassica_rapa_copy6</i>              |
| Carubv10005847m.g                             | <i>Capsella_rubella_copy2</i>           |
| Carubv10007296m.g                             | <i>Capsella_rubella_copy3</i>           |
| Carubv10007166m.g                             | <i>Capsella_rubella_copy4</i>           |
| Bostr.12645s0002                              | <i>Boechera_stricta_copy2</i>           |
| Bostr.12645s0001                              | <i>Boechera_stricta_copy3</i>           |

---

|                           |                                   |
|---------------------------|-----------------------------------|
| Bostr.12645s0004          | <i>Boechera_stricta_copy4</i>     |
| AT5G38430                 | <i>Arabidopsis_thaliana_copy2</i> |
| AT5G38420                 | <i>Arabidopsis_thaliana_copy3</i> |
| AT5G38410                 | <i>Arabidopsis_thaliana_copy4</i> |
| AL7G52150                 | <i>Arabidopsis_lyrata_copy2</i>   |
| AL7G52160                 | <i>Arabidopsis_lyrata_copy3</i>   |
| Araha.19953s0004          | <i>Arabidopsis_halleri_copy2</i>  |
| AL7G52170                 | <i>Arabidopsis_lyrata_copy4</i>   |
| Araha.19953s0005          | <i>Arabidopsis_halleri_copy3</i>  |
| evm.TU.supercontig_282.14 | <i>Carica_papaya_copy1</i>        |
| Ciclev10012893m.g         | <i>Citrus_clementina_copy1</i>    |
| 27524.t000006             | <i>Ricinus_communis_copy1</i>     |
| evm.TU.supercontig_1.37   | <i>Carica_papaya_copy2</i>        |
| evm.TU.supercontig_1.38   | <i>Carica_papaya_copy3</i>        |
| Thecc1EG012342            | <i>Theobroma_cacao_copy1</i>      |
| 29974.t000003             | <i>Ricinus_communis_copy2</i>     |
| Manes.05G137400           | <i>Manihot_esculenta_copy1</i>    |
| Manes.01G011500           | <i>Manihot_esculenta_copy2</i>    |
| Thecc1EG009873            | <i>Theobroma_cacao_copy2</i>      |
| Thecc1EG009872            | <i>Theobroma_cacao_copy3</i>      |
| Thecc1EG019454            | <i>Theobroma_cacao_copy4</i>      |
| Gorai.001G201800          | <i>Gossypium_raimondii_copy1</i>  |
| Gorai.007G181300          | <i>Gossypium_raimondii_copy2</i>  |
| Gorai.007G181400          | <i>Gossypium_raimondii_copy3</i>  |
| Potri.017G114600          | <i>Populus_trichocarpa_copy1</i>  |
| SapurV1A.0101s0240        | <i>Salix_purpurea_copy1</i>       |
| Potri.004G100000          | <i>Populus_trichocarpa_copy2</i>  |
| SapurV1A.0315s0080        | <i>Salix_purpurea_copy2</i>       |
| 30167.t000038             | <i>Ricinus_communis_copy3</i>     |
| Ciclev10023403m.g         | <i>Citrus_clementina_copy2</i>    |
| Solyc02g085950.2          | <i>Solanum_lycopersicum_copy1</i> |
| PGSC0003DMG400012666      | <i>Solanum_tuberosum_copy1</i>    |
| PGSC0003DMG400026409      | <i>Solanum_tuberosum_copy2</i>    |
| Solyc03g034220.2          | <i>Solanum_lycopersicum_copy2</i> |
| PGSC0003DMG400019584      | <i>Solanum_tuberosum_copy3</i>    |
| Solyc02g063150.2          | <i>Solanum_lycopersicum_copy3</i> |
| PGSC0003DMG400024182      | <i>Solanum_tuberosum_copy4</i>    |
| Medtr7g007230             | <i>Medicago_truncatula_copy1</i>  |
| Medtr7g007200             | <i>Medicago_truncatula_copy2</i>  |
| Medtr7g007120             | <i>Medicago_truncatula_copy3</i>  |
| Medtr7g007220             | <i>Medicago_truncatula_copy4</i>  |
| Medtr7g007210             | <i>Medicago_truncatula_copy5</i>  |
| Tp57577_TGAC_v2_gene32455 | <i>Trifolium_pratense_copy1</i>   |
| Tp57577_TGAC_v2_gene32462 | <i>Trifolium_pratense_copy2</i>   |
| Medtr6g018300             | <i>Medicago_truncatula_copy6</i>  |
| Medtr6g018310             | <i>Medicago_truncatula_copy7</i>  |
| Phvul.004G064800          | <i>Phaseolus_vulgaris_copy1</i>   |
| Phvul.004G073400          | <i>Phaseolus_vulgaris_copy2</i>   |
| Phvul.004G073450          | <i>Phaseolus_vulgaris_copy3</i>   |
| Glyma.13G046200           | <i>Glycine_max_copy1</i>          |
| Glyma.19G046900           | <i>Glycine_max_copy2</i>          |
| Glyma.19G046800           | <i>Glycine_max_copy3</i>          |
| Glyma.19G046600           | <i>Glycine_max_copy4</i>          |
| Glyma.18G296900           | <i>Glycine_max_copy5</i>          |
| Glyma.14G089500           | <i>Glycine_max_copy6</i>          |

---

---

|                  |                                      |
|------------------|--------------------------------------|
| Glyma.08G365300  | <i>Glycine_max_copy7</i>             |
| Glyma.18G182200  | <i>Glycine_max_copy8</i>             |
| Glyma.18G182300  | <i>Glycine_max_copy9</i>             |
| Sobic.005G042000 | <i>Sorghum_bicolor_copy1</i>         |
| GRMZM2G098520    | <i>Zea_mays_copy1</i> (Ensembl-18)   |
| Zm00008a017851   | <i>Zea_mays_copy1</i> (PH207 v1.1)   |
| GRMZM2G113033    | <i>Zea_mays_copy2</i> (Ensembl-18)   |
| Zm00008a008283   | <i>Zea_mays_copy2</i> (PH207 v1.1)   |
| Pavir.Cb01387    | <i>Panicum_virgatum_copy1</i>        |
| Pavir.J32704     | <i>Panicum_virgatum_copy2</i>        |
| Pavir.Ca02105    | <i>Panicum_virgatum_copy3</i>        |
| Pavir.Cb01593    | <i>Panicum_virgatum_copy4</i>        |
| Pahal.C03268     | <i>Panicum_hallii_copy1</i>          |
| Pahal.C03271     | <i>Panicum_hallii_copy2</i>          |
| Pahal.C03575     | <i>Panicum_hallii_copy3</i>          |
| Pahal.C03582     | <i>Panicum_hallii_copy4</i>          |
| Pahal.C03269     | <i>Panicum_hallii_copy5</i>          |
| Seita.3G312200   | <i>Setaria_italica_copy1</i>         |
| Sevir.3G315200   | <i>Setaria_viridis_copy1</i>         |
| Seita.3G312000   | <i>Setaria_italica_copy2</i>         |
| Seita.3G312400   | <i>Setaria_italica_copy3</i>         |
| Sevir.3G319300   | <i>Setaria_viridis_copy2</i>         |
| Sevir.3G315400   | <i>Setaria_viridis_copy3</i>         |
| Seita.3G269500   | <i>Setaria_italica_copy4</i>         |
| Sevir.3G276100   | <i>Setaria_viridis_copy4</i>         |
| Seita.3G269600   | <i>Setaria_italica_copy5</i>         |
| Sevir.3G276200   | <i>Setaria_viridis_copy5</i>         |
| LOC_Os12g17600   | <i>Oryza_sativa_copy1</i>            |
| LOC_Os12g19470   | <i>Oryza_sativa_copy2</i>            |
| LOC_Os12g19381   | <i>Oryza_sativa_copy3</i>            |
| Bradi5g04080     | <i>Brachypodium_distachyon_copy1</i> |
| Brast09G038200   | <i>Brachypodium_stacei_copy1</i>     |
| Bradi3g26385     | <i>Brachypodium_distachyon_copy2</i> |
| Brast03G114700   | <i>Brachypodium_stacei_copy2</i>     |
| Bradi3g26391     | <i>Brachypodium_distachyon_copy3</i> |
| Bradii4g08500    | <i>Brachypodium_distachyon_copy4</i> |
| Brast10G096300   | <i>Brachypodium_stacei_copy3</i>     |
| Bradi4g08800     | <i>Brachypodium_distachyon_copy5</i> |
| Brast10G107800   | <i>Brachypodium_stacei_copy4</i>     |

---

**Table S2. Minimum number of *rbcS* gene copies per species in angiosperms**

|                                   | lineage1 | lineage2 |
|-----------------------------------|----------|----------|
| <i>Aquilegia coerulea</i>         | 2        | 1        |
| <i>Arabidopsis halleri</i>        | 3        | 0        |
| <i>Arabidopsis lyrata</i>         | 4        | 0        |
| <i>Arabidopsis thaliana</i>       | 4        | 0        |
| <i>Brassica oleracea capitata</i> | 3        | 0        |
| <i>Boechera stricta</i>           | 4        | 0        |
| <i>Brassica rapa</i>              | 6        | 0        |
| <i>Brachypodium distachyon</i>    | 5        | 0        |
| <i>Brachypodium stacei</i>        | 4        | 0        |
| <i>Capsella grandiflora</i>       | 1        | 0        |
| <i>Carica papaya</i>              | 3        | 1        |
| <i>Capsella rubella</i>           | 4        | 0        |
| <i>Citrus clementina</i>          | 2        | 1        |
| <i>Citrus sinensis</i>            | 0        | 1        |
| <i>Eucalyptus grandis</i>         | 3        | 1        |
| <i>Eutrema salsugineum</i>        | 3        | 0        |
| <i>Fragaria vesca</i>             | 2        | 1        |
| <i>Glycine_max</i>                | 9        | 1        |
| <i>Gossypium raimondii</i>        | 3        | 1        |
| <i>Kalanchoe fedtschenkoi</i>     | 2        | 0        |
| <i>Kalanchoe laxiflora</i>        | 4        | 0        |
| <i>Linum usitatissimum</i>        | 4        | 2        |
| <i>Malus domestica</i>            | 6        | 0        |
| <i>Manihot esculenta</i>          | 2        | 1        |
| <i>Mimulus guttatus</i>           | 3        | 1        |
| <i>Medicago truncatula</i>        | 7        | 1        |
| <i>Oryza sativa</i>               | 3        | 1        |
| <i>Panicum hallii</i>             | 5        | 1        |
| <i>Prunus persica</i>             | 2        | 1        |
| <i>Populus trichocarpa</i>        | 2        | 1        |
| <i>Panicum virgatum</i>           | 4        | 0        |
| <i>Phaseolus vulgaris</i>         | 3        | 0        |
| <i>Ricinus communis</i>           | 3        | 1        |
| <i>Sorghum bicolor</i>            | 1        | 0        |
| <i>Setaria italica</i>            | 5        | 1        |
| <i>Solanum lycopersicum</i>       | 3        | 1        |
| <i>Salix purpurea</i>             | 2        | 1        |
| <i>Solanum tuberosum</i>          | 4        | 1        |
| <i>Setaria viridis</i>            | 5        | 0        |
| <i>Theobroma cacao</i>            | 4        | 1        |
| <i>Trifolium pratense</i>         | 2        | 1        |
| <i>Vitis vinifera</i>             | 1        | 1        |
| <i>Zea mays</i>                   | 4        | 0        |
| Total number of gene copies       | 146      | 25       |
| Total number of species           | 42       | 24       |

**A.**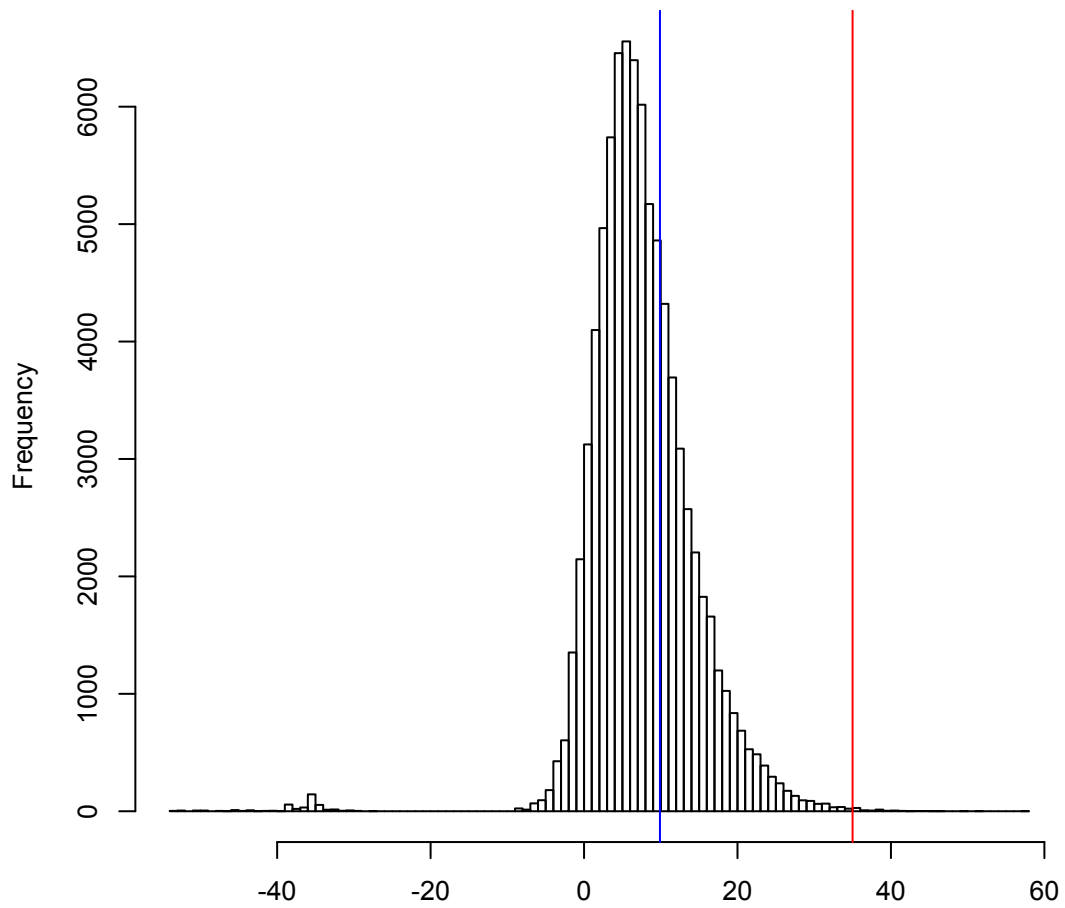**B.**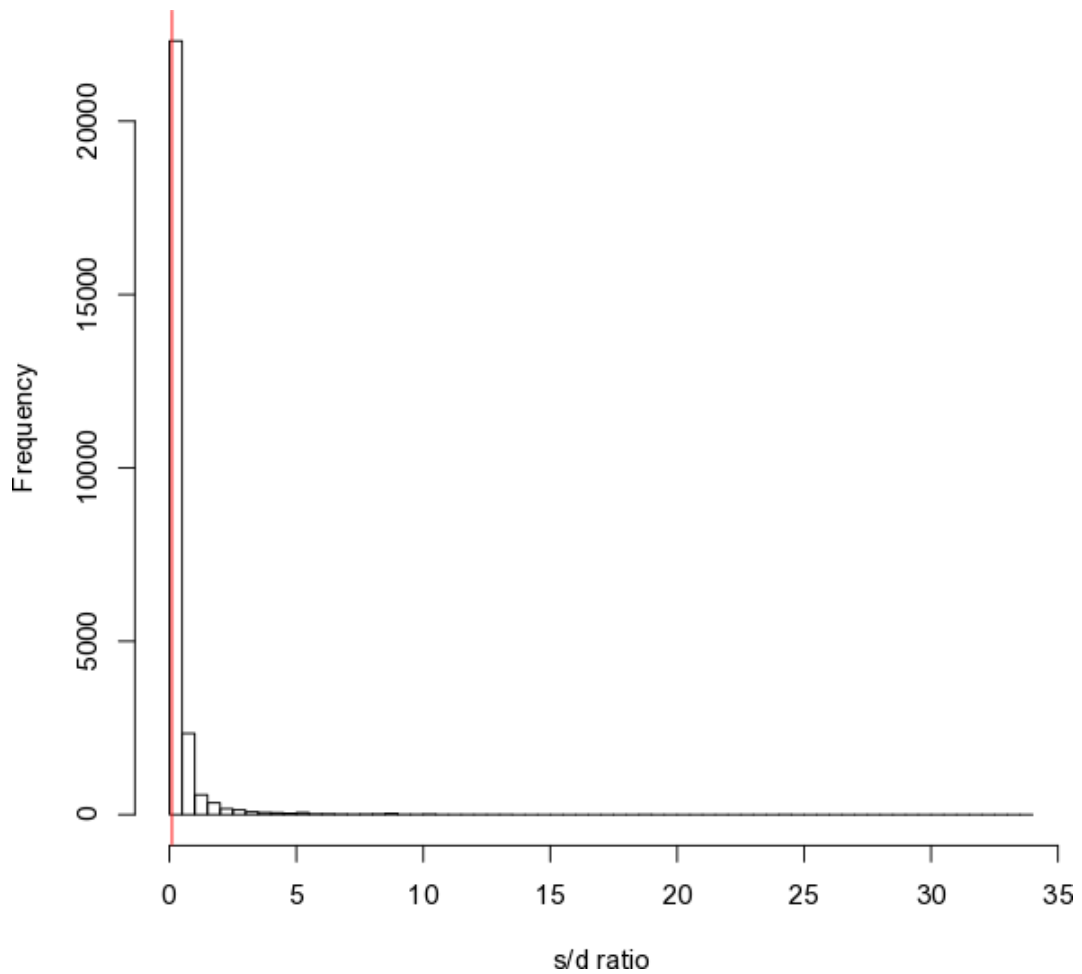

**Fig. S1. A) dAIC distribution of frequency of coevolving profiles by Coev model (Blue line: dAIC=9.893, Red line: dAIC=35). B) s/d ratio distribution of frequency of coevolving profiles by Coev model filtered by dAIC more than 9.893 (Red line: s/d ratio=0.1).**

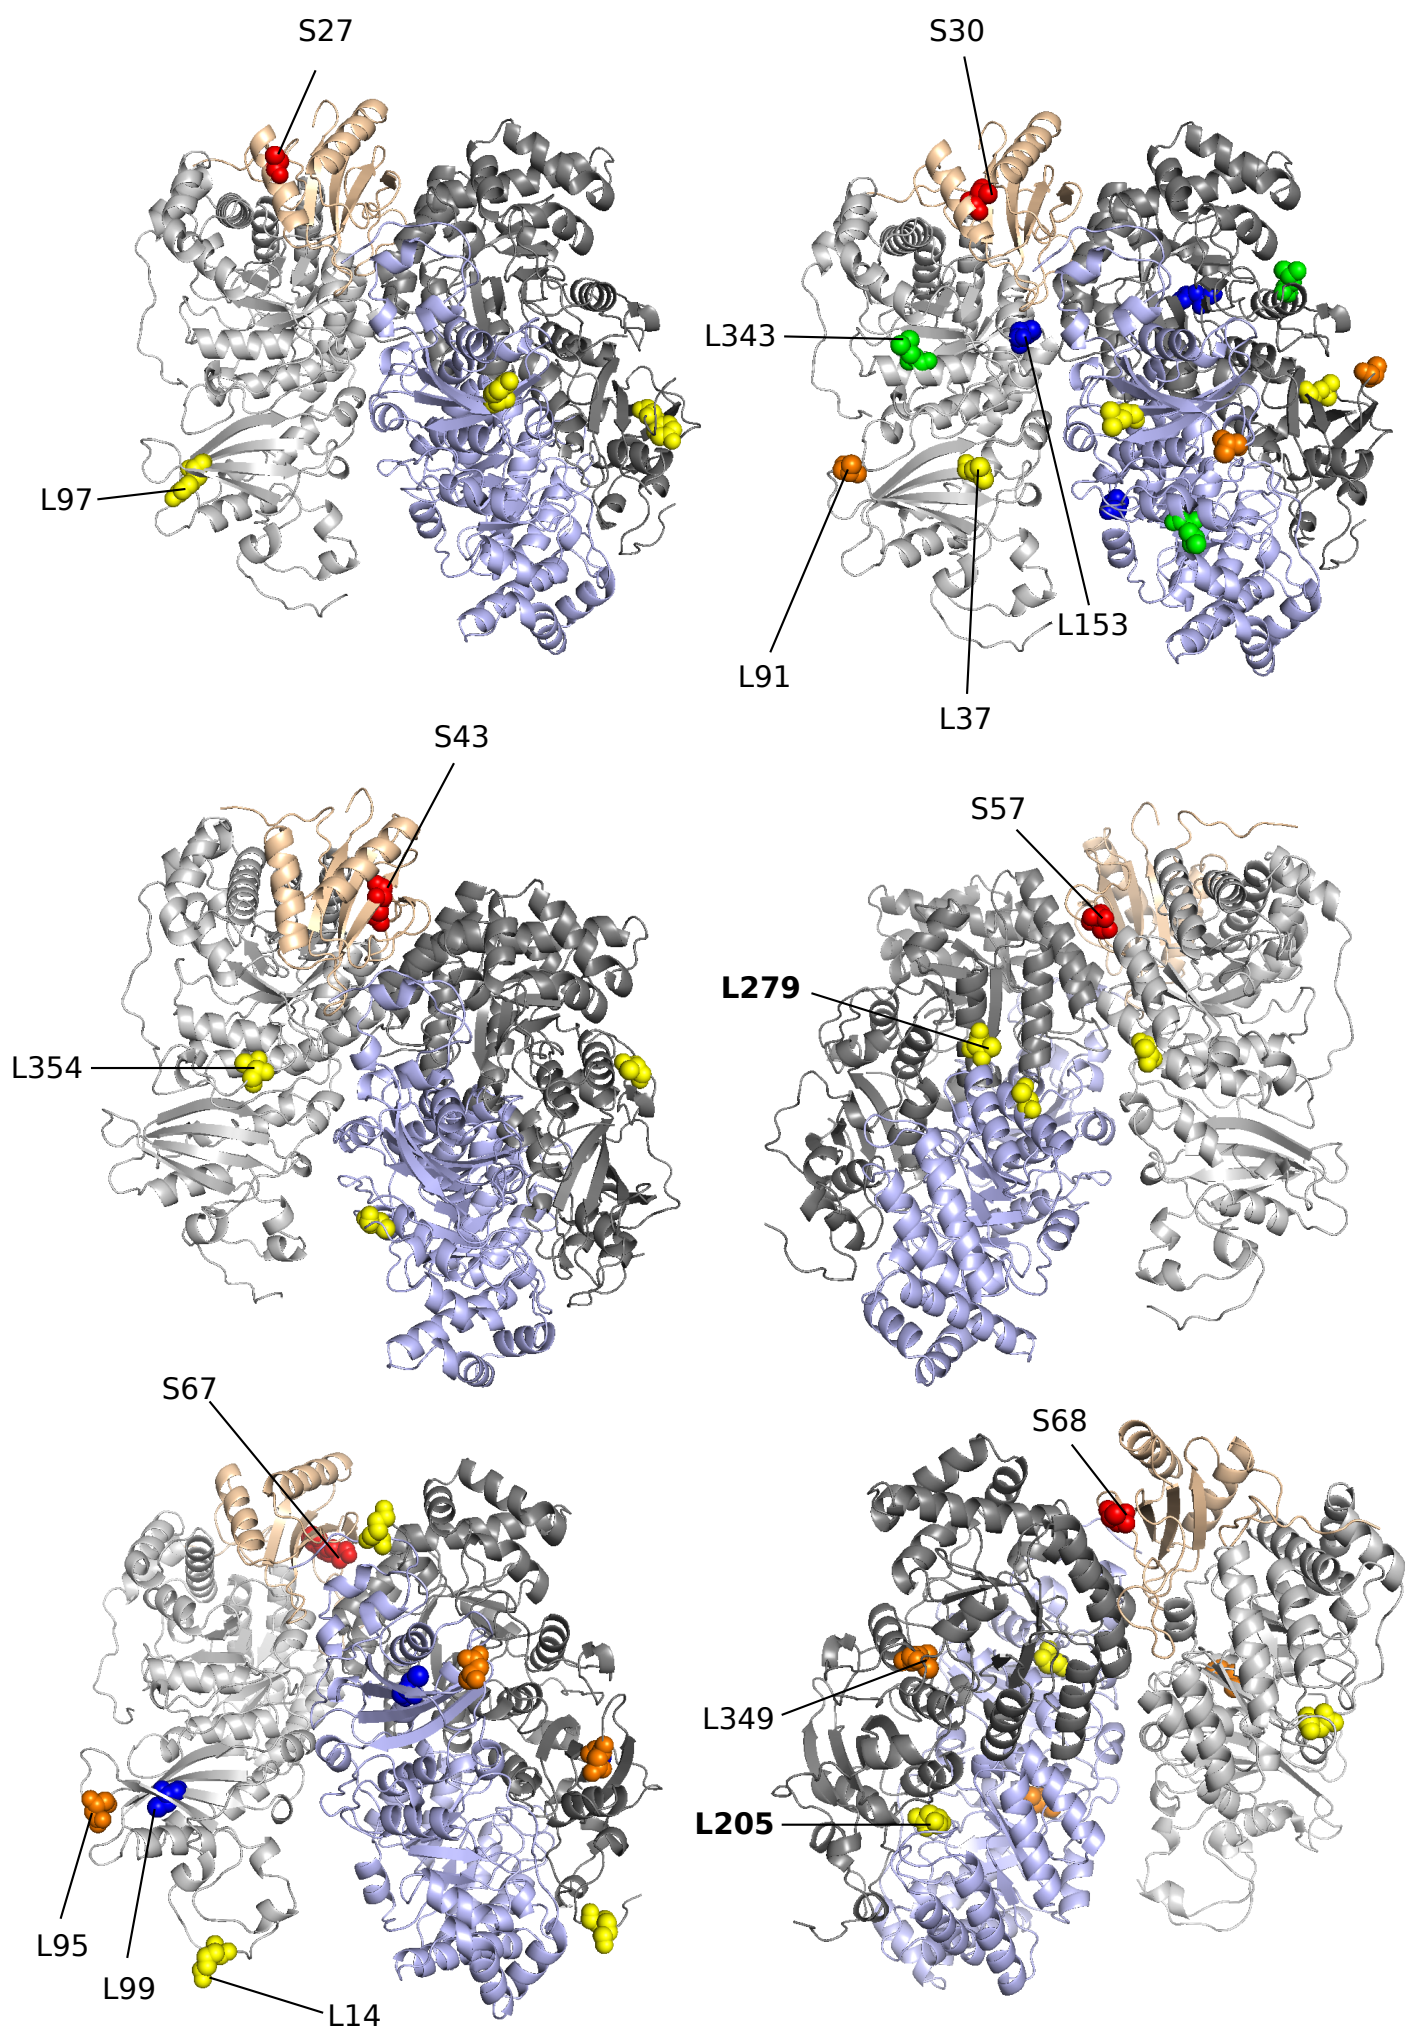

**Fig. S2. A.** The residues of RBCS and RBCL under coevolution plotted to known RuBisCO structure of spinach (1RCX of Protein Data Bank; Taylor et al., 1997).

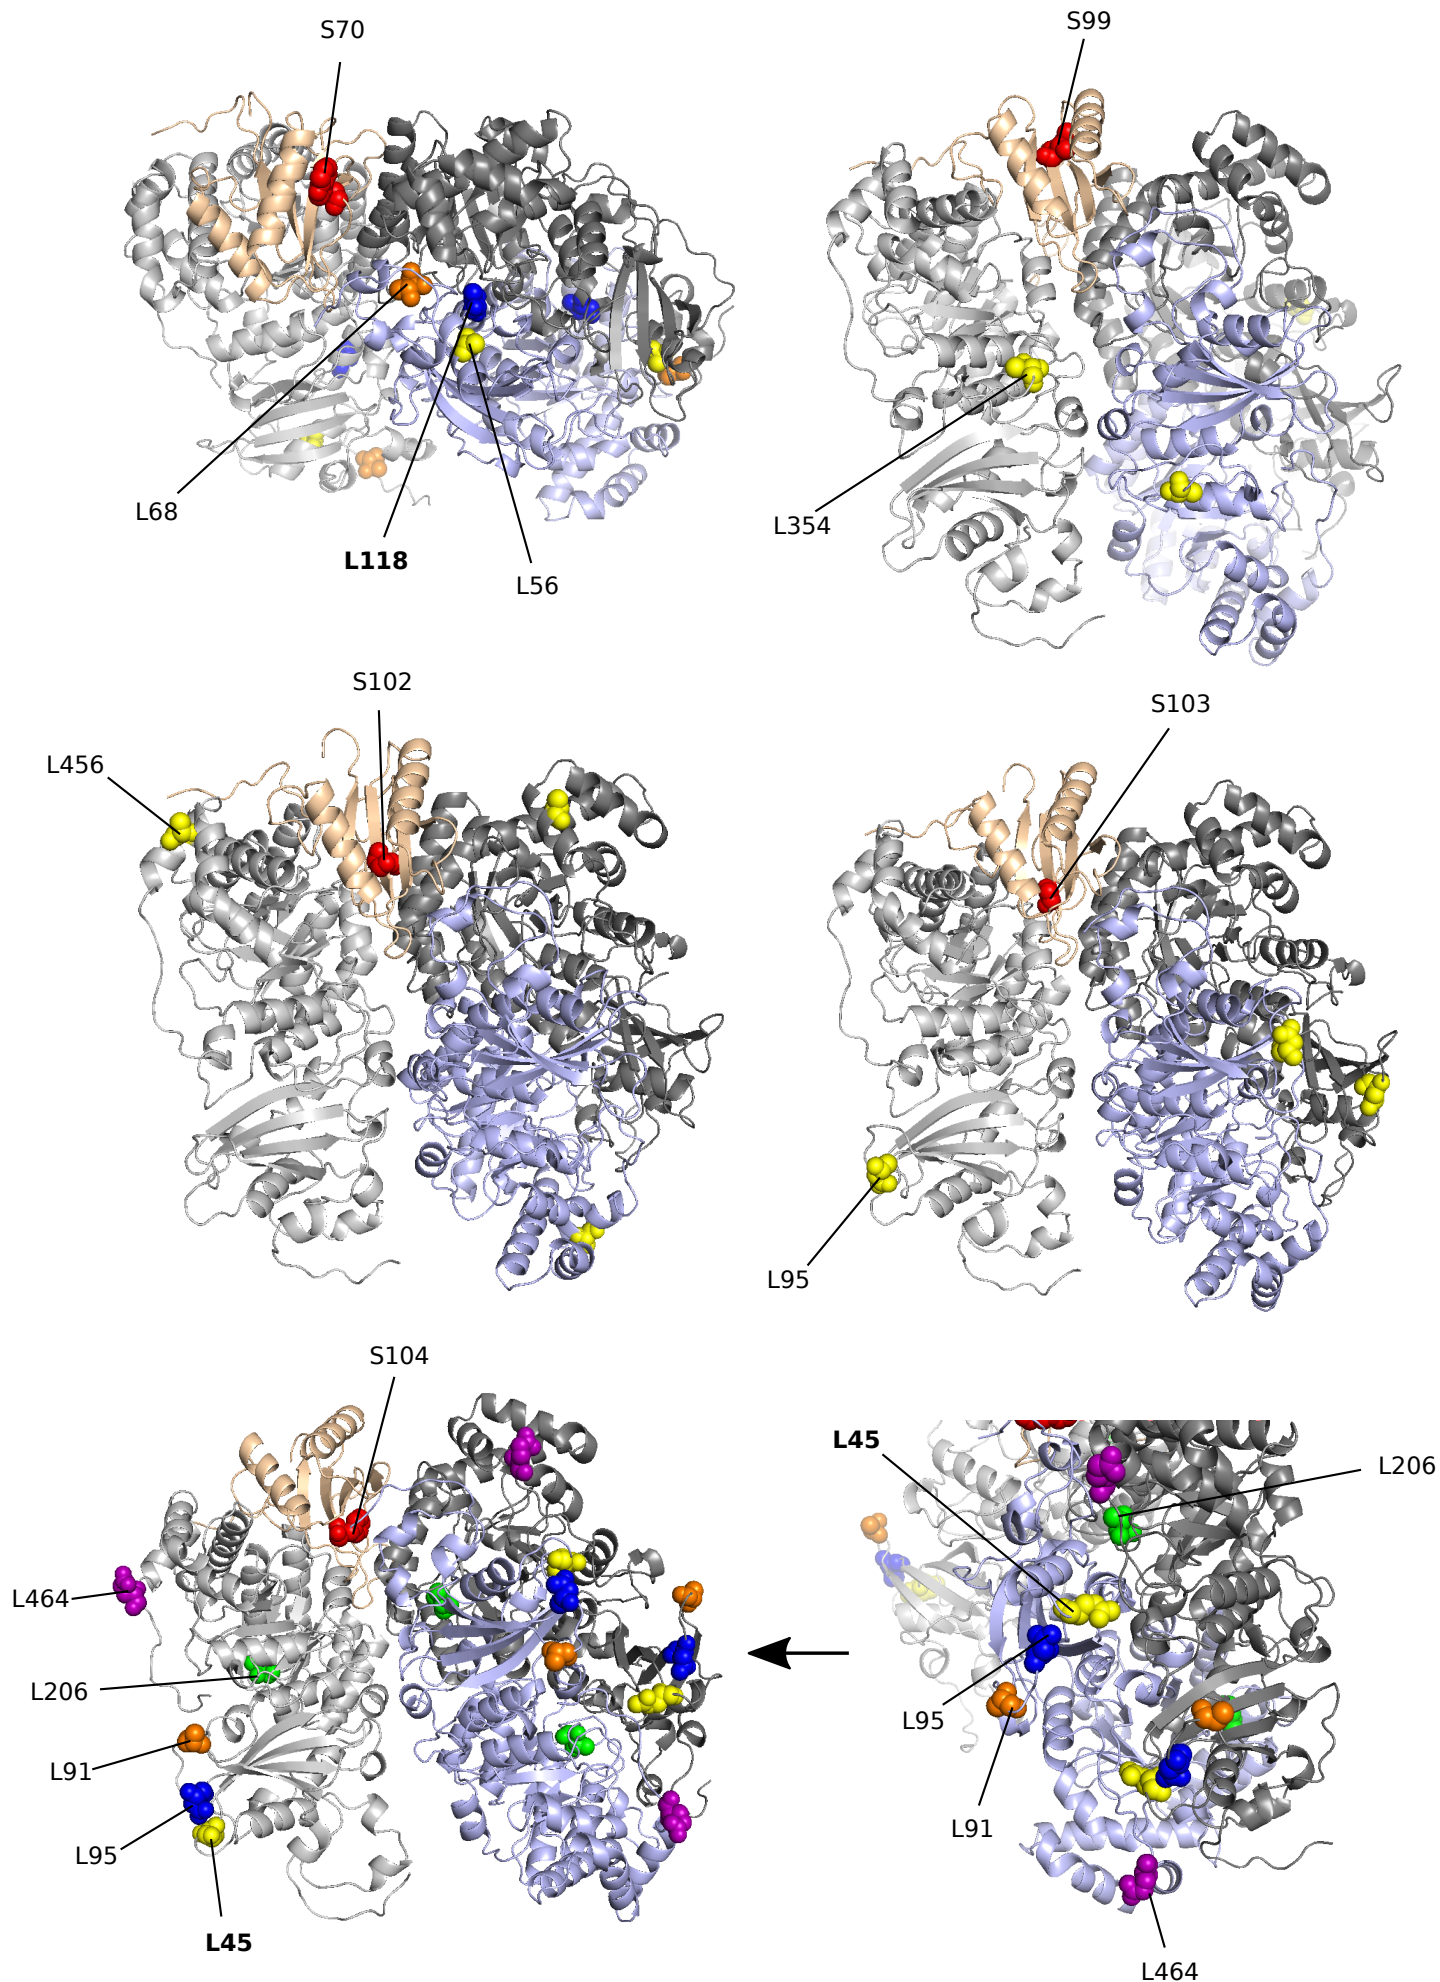

**Fig. S2. B. The residues of RBCS and RBCL under coevolution plotted to known RuBisCO structure of spinach (1RCX of Protein Data Bank; Taylor et al., 1997).**

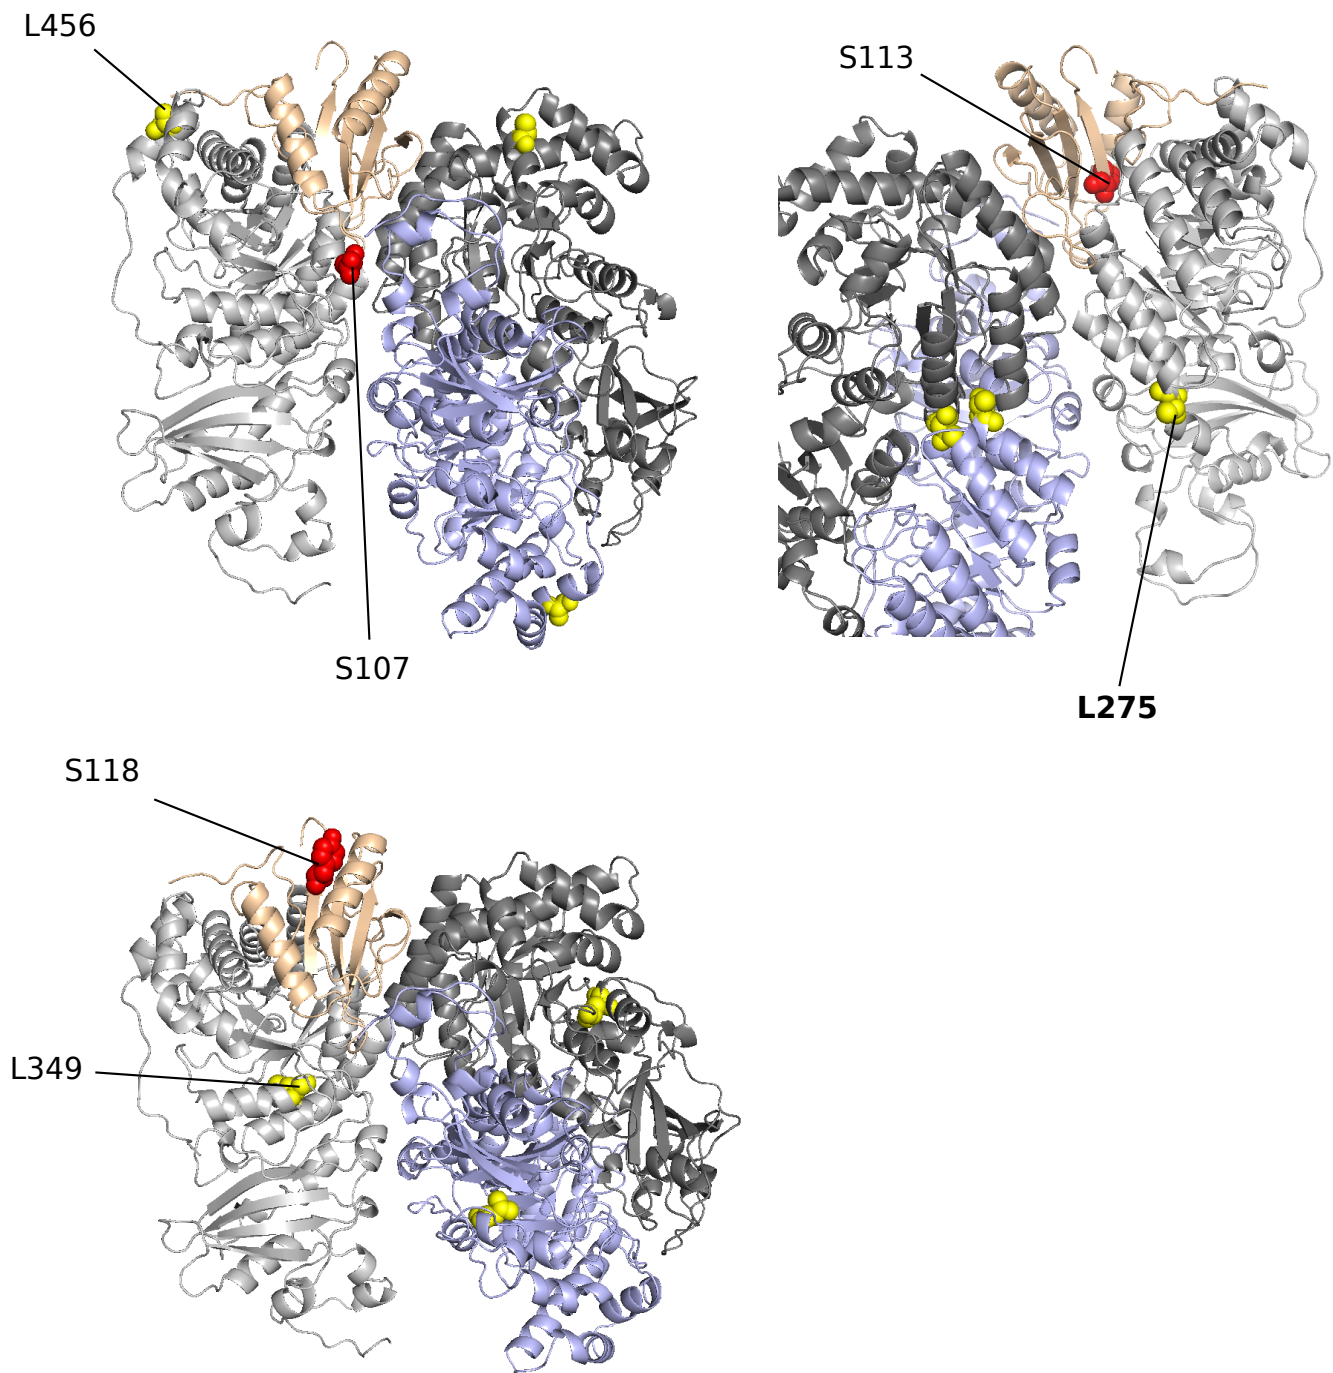

**Fig. S2. C. The residues of RBCS and RBCL under coevolution plotted to known RuBisCO structure of spinach (1RCX of Protein Data Bank; Taylor et al., 1997).**
